# Supplementary material
Source: PubMed Central journal article supplement (PMC4420684)
Supplement: NIHMS682419-supplement-01.pdf [file NIHMS682419-supplement-01.pdf]

**Supplemental Table 1: International Classification of Diseases, 9<sup>th</sup> Edition, clinical modification codes to define infections on immunosuppression**

| <b>Infection</b>             | <b>ICD-9-CM codes</b> |
|------------------------------|-----------------------|
| Streptococcal sore throat    | 034.0                 |
| Sepsis                       | 038.0 – 038.9         |
| Bacteremia                   | 790.7                 |
| Other bacterial infections   | 041.0 – 041.9         |
| Listeria                     | 027.0                 |
| Tuberculosis                 | 010 – 018             |
| Viral pneumonia              | 480.x                 |
| Pneumococcal pneumonia       | 481.x                 |
| Bacterial pneumonia          | 481.x – 482.x         |
| Any pneumonia                | 480 - 486             |
| Influenza                    | 487.0 – 487.8, 488    |
| Varicella                    | 052.x                 |
| Herpes simplex               | 054.x                 |
| Herpes zoster                | 053.x                 |
| Cytomegalovirus infection    | 078.5                 |
| Epstein-Barr virus infection | 075                   |
| Cellulitis                   | 528.3, 680-686        |
| Lung abscess                 | 513.0                 |
| Urinary infection            | 599.0, 590.x          |
| Meningitis                   | 320 – 324.x           |
